# Supplementary material
Source: PubMed Central journal article supplement (PMC4868182)

Supplementary Figure S2.  
*miR-155* is highly expressed in AML primary blasts,  
as compared to normal bone marrow samples

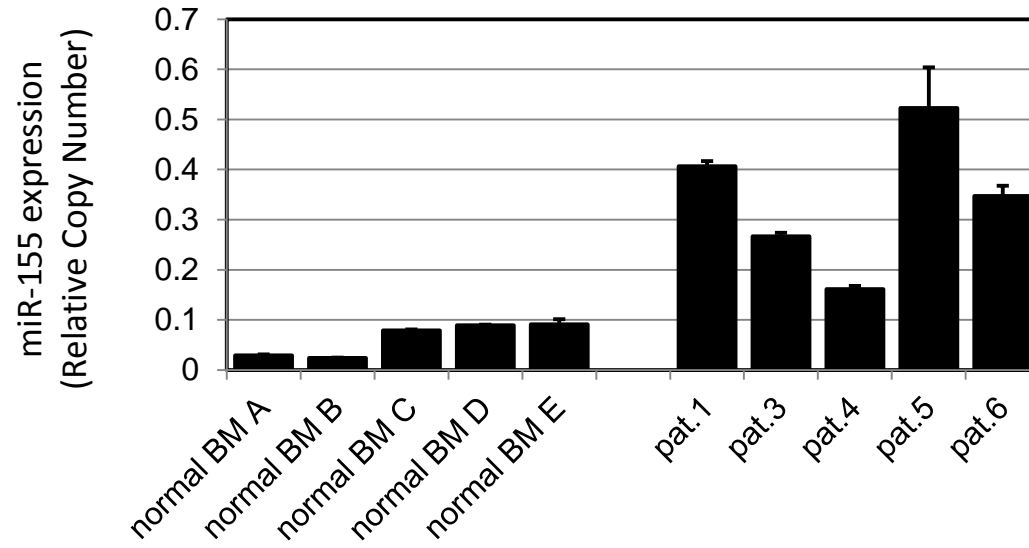

Supplement: NIHMS780742-supplement-Supp_Info_-_Fig_2.pdf [file NIHMS780742-supplement-Supp_Info_-_Fig_2.pdf]
