# Supplementary material
Source: PubMed Central journal article supplement (PMC4868182)

# Supplementary Figure S4.

## MLN4924 inhibits cell proliferation and induces apoptosis of FLT3-ITD AML cells

**A.**

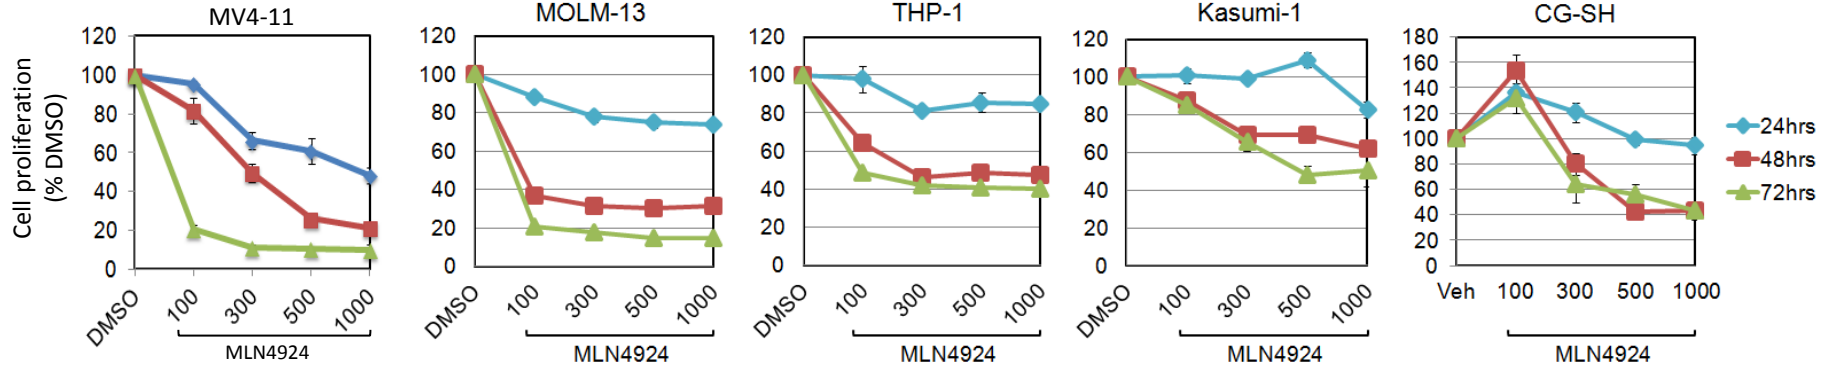

**B.**

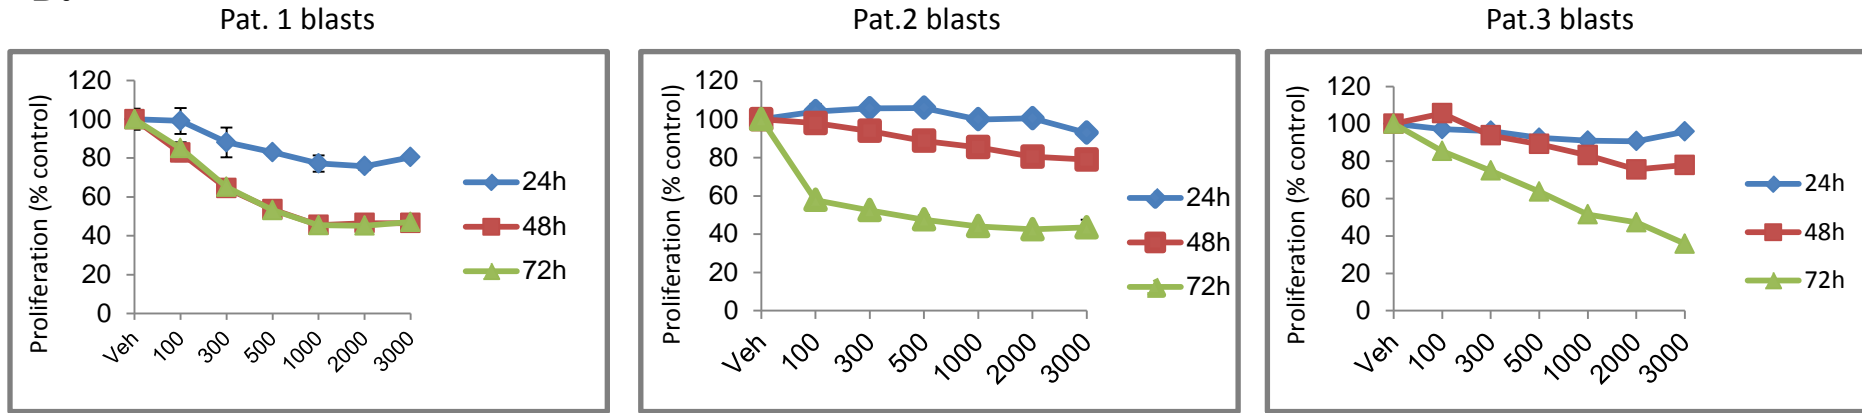

**C.**

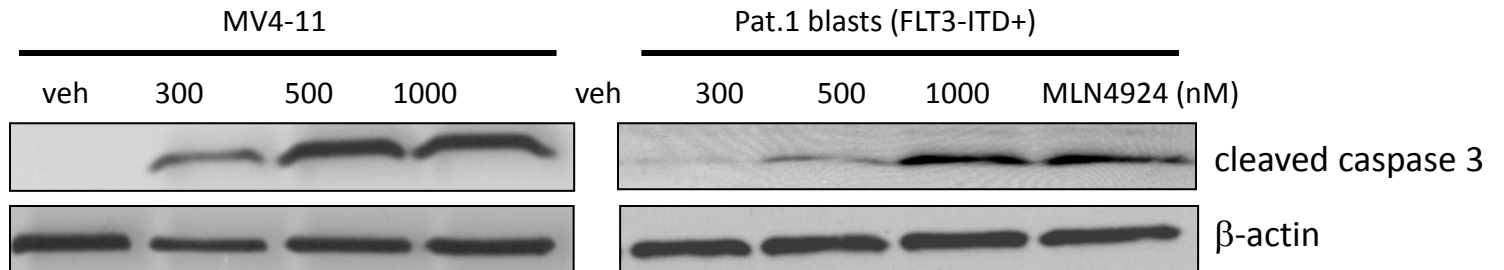

Supplement: NIHMS780742-supplement-Supp_Info_-_Fig_4.pdf [file NIHMS780742-supplement-Supp_Info_-_Fig_4.pdf]
