# Supplementary material
Source: PubMed Central journal article supplement (PMC4868182)

# Supplementary Figure S5.

MLN4924 treatment inhibits neddylation-activating enzyme and its substrate, I $\kappa$ B- $\alpha$ , as well as NF- $\kappa$ B transcriptional activity

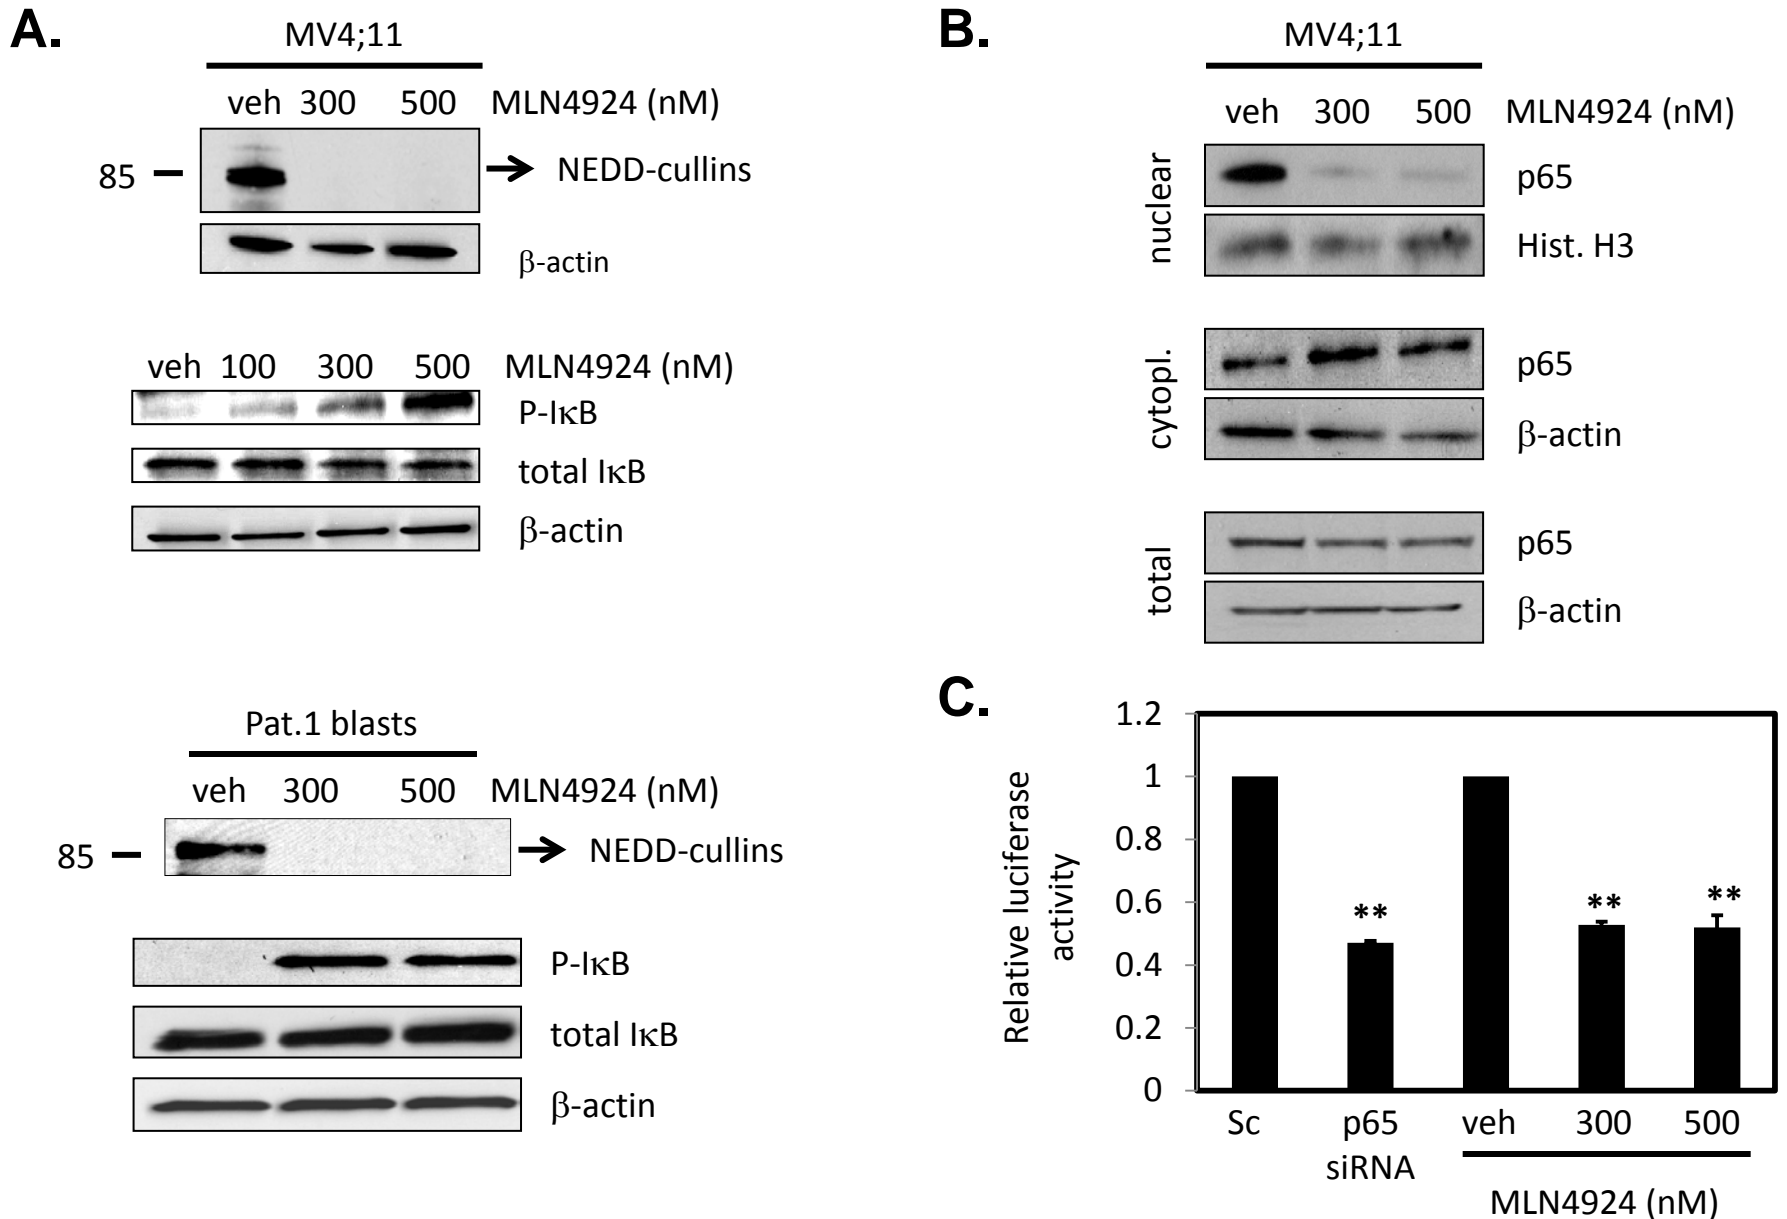

Supplement: NIHMS780742-supplement-Supp_Info_-_Fig_5.pdf [file NIHMS780742-supplement-Supp_Info_-_Fig_5.pdf]
