# Supplementary material
Source: PubMed Central journal article supplement (PMC4868182)

# Supplementary Figure S7.

MLN4924 inhibits NF- $\kappa$ B binding to *miR-155* promoter in 293T cells stimulated with PMA

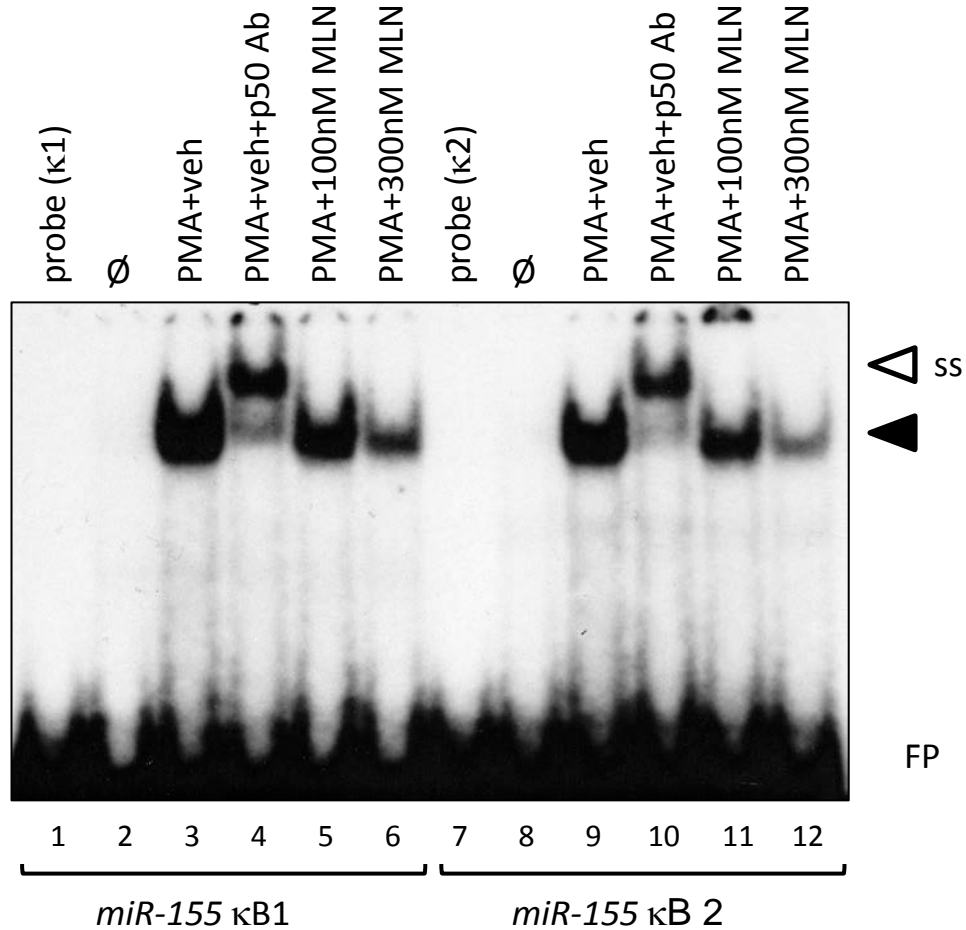

Supplement: NIHMS780742-supplement-Supp_Info_-_Fig_7.pdf [file NIHMS780742-supplement-Supp_Info_-_Fig_7.pdf]
