# Supplementary material
Source: PubMed Central journal article supplement (PMC4868182)

# Supplementary Figure S9.

## Low levels of nuclear PU.1 are required for antileukemic activity of MLN4924

**A.**

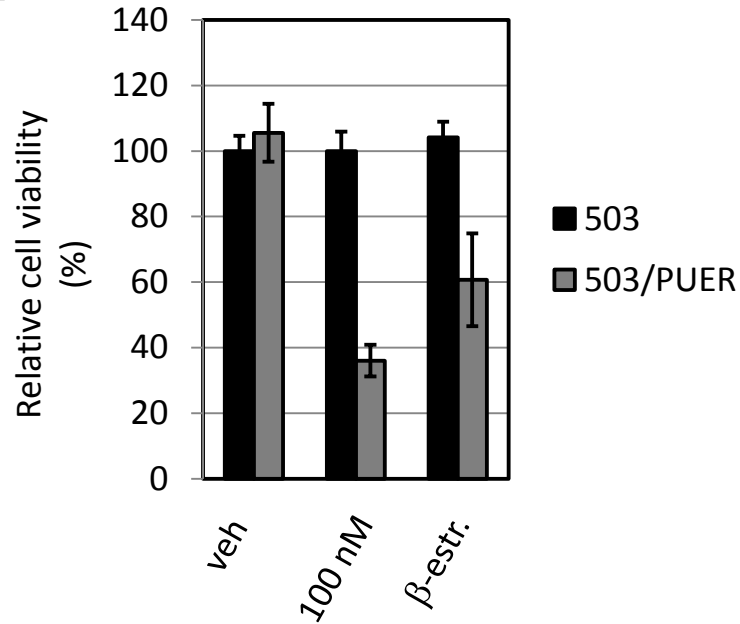

**B.**

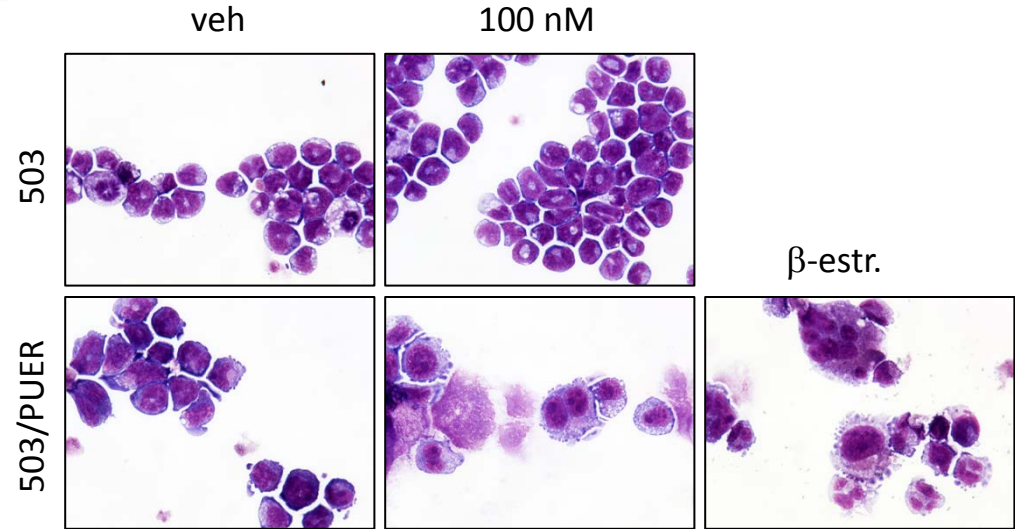

**C.**

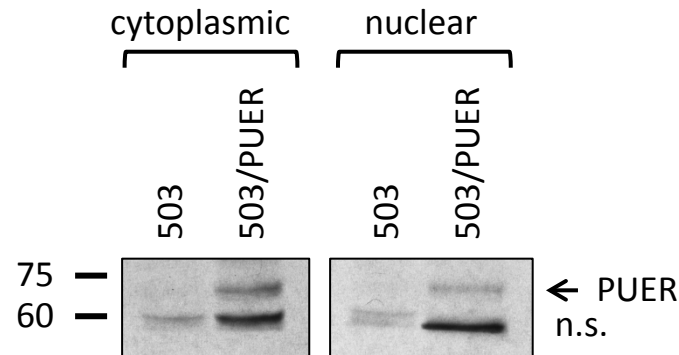

Supplement: NIHMS780742-supplement-Supp_Info_-_Fig_9.pdf [file NIHMS780742-supplement-Supp_Info_-_Fig_9.pdf]
