# Supplementary material
Source: PubMed Central journal article supplement (PMC4868182)
Supplement: NIHMS780742-supplement-Supp_Info_-_Table_1.pdf [file NIHMS780742-supplement-Supp_Info_-_Table_1.pdf]

Supplementary Table S1. Sequences of oligonucleotides used as probes for EMSA

| Oligonucleotide name             | Oligonucleotide sequence   |
|----------------------------------|----------------------------|
| <i>Ig</i> κB sense               | TCGACAGAGGGGACTTTCCCAGAGGC |
| <i>Ig</i> κB antisense           | AGCTGCCTCTGGGAAAGTCCCCTCTG |
| <i>miR-155</i> κB1 sense         | AAGTACTATGGGATTTCCAGCT     |
| <i>miR-155</i> κB1 antisense     | TCAGAGCTGGAAATCCCATAGTA    |
| <i>miR-155</i> mut κB1 sense     | AAGTACTATCTCATTTCCAGCT     |
| <i>miR-155</i> mut κB1 antisense | TCAGAGCTGGAAATGAGATAGTA    |
| <i>miR-155</i> κB2 sense         | TGAGAAATGGGAAATTCAGAAAG    |
| <i>miR-155</i> κB2 antisense     | TGCCTTTCTGAATTTCCCATT      |
| <i>miR-155</i> mut κB2 sense     | TGAGAAATCTCAAATTCAGAAAG    |
| <i>miR-155</i> mut κB2 antisense | TGCCTTTCTGAATTTGAGATT      |
| CEBP sense                       | TGTAGTCTTTTGAAATGGCATA     |
| CEBP antisense                   | GTTTATGCCATTTCAAAGACT      |
