# Supplementary material
Source: PubMed Central journal article supplement (PMC4868182)
Supplement: NIHMS780742-supplement-Supp_Info_-_Table_3.pdf [file NIHMS780742-supplement-Supp_Info_-_Table_3.pdf]

### Supplementary Table S3.

Median Fluorescence Intensities of cell surface markers on primary AML blasts (pat. 1) treated with MLN4924 for 6 days

| Treatment | CD33   | CD14 | CD115 | CD11b | CD11c | CD36  |
|-----------|--------|------|-------|-------|-------|-------|
| DMSO      | 33,547 | 636  | 35    | 504   | 1,079 | 1,074 |
| 50nM      | 22,525 | 702  | 21    | 740   | 1,298 | 853   |
| 100nM     | 16,780 | 883  | 13    | 871   | 1,392 | 861   |
