# Supplementary material
Source: PubMed Central journal article supplement (PMC4868182)

Supplementary Figure S1.  
*miR-155* expression in AML cell lines

**A.**

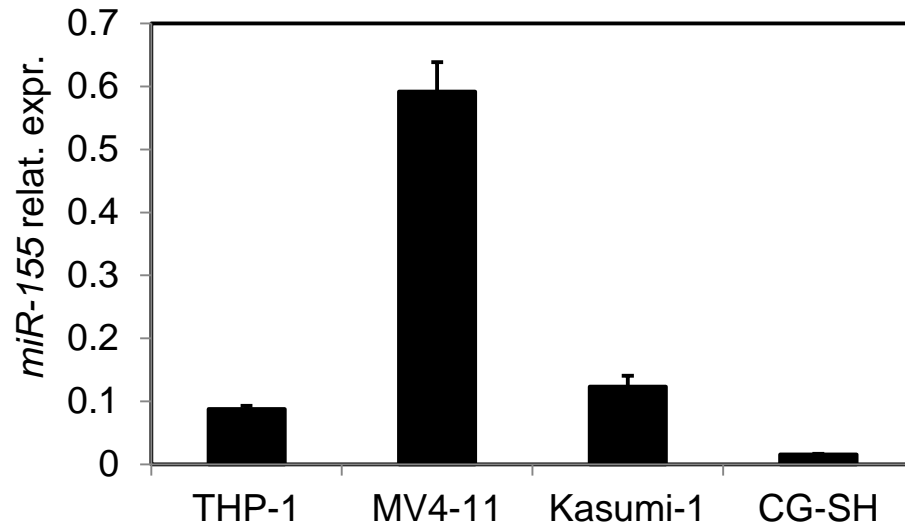

**B.**

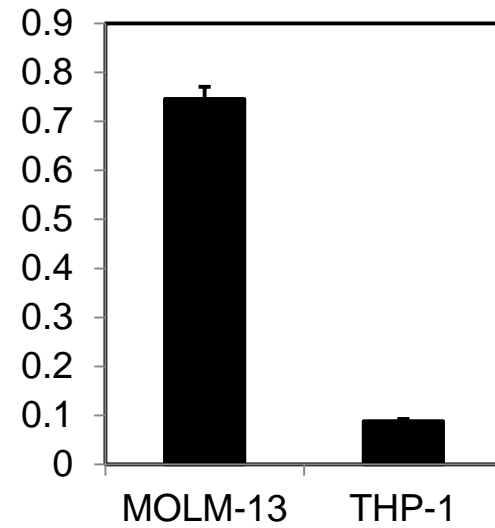

Supplement: NIHMS780742-supplement-Supp_Info_-_Fig_1.pdf [file NIHMS780742-supplement-Supp_Info_-_Fig_1.pdf]

Supplementary Figure S6.

Binding of NF $\kappa$ B to *miR-155* promoter is abrogated by point mutations

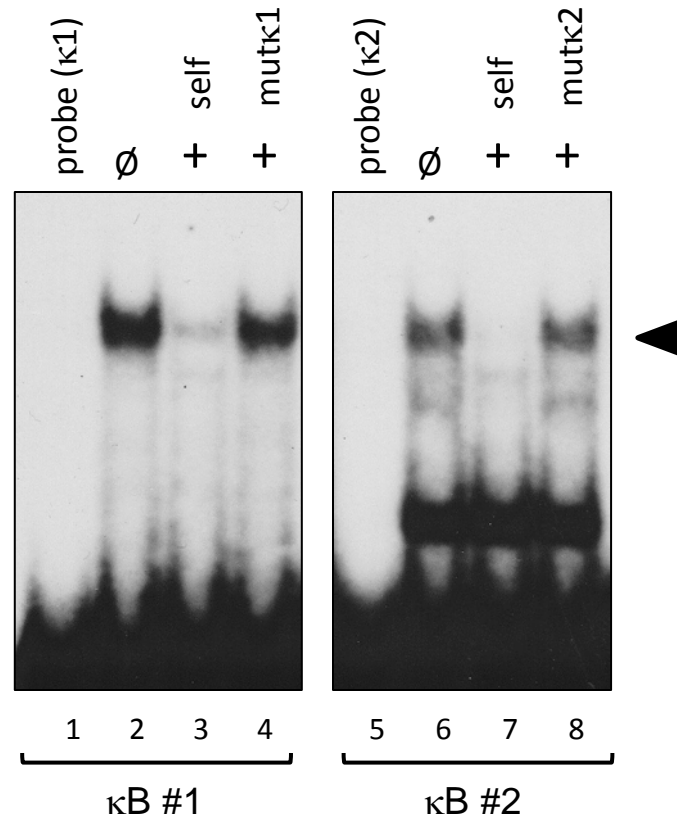

Supplement: NIHMS780742-supplement-Supp_Info_-_Fig_6.pdf [file NIHMS780742-supplement-Supp_Info_-_Fig_6.pdf]

# Supplementary Figure S8.

## MLN4924 induces differentiation of MV4-11 cells

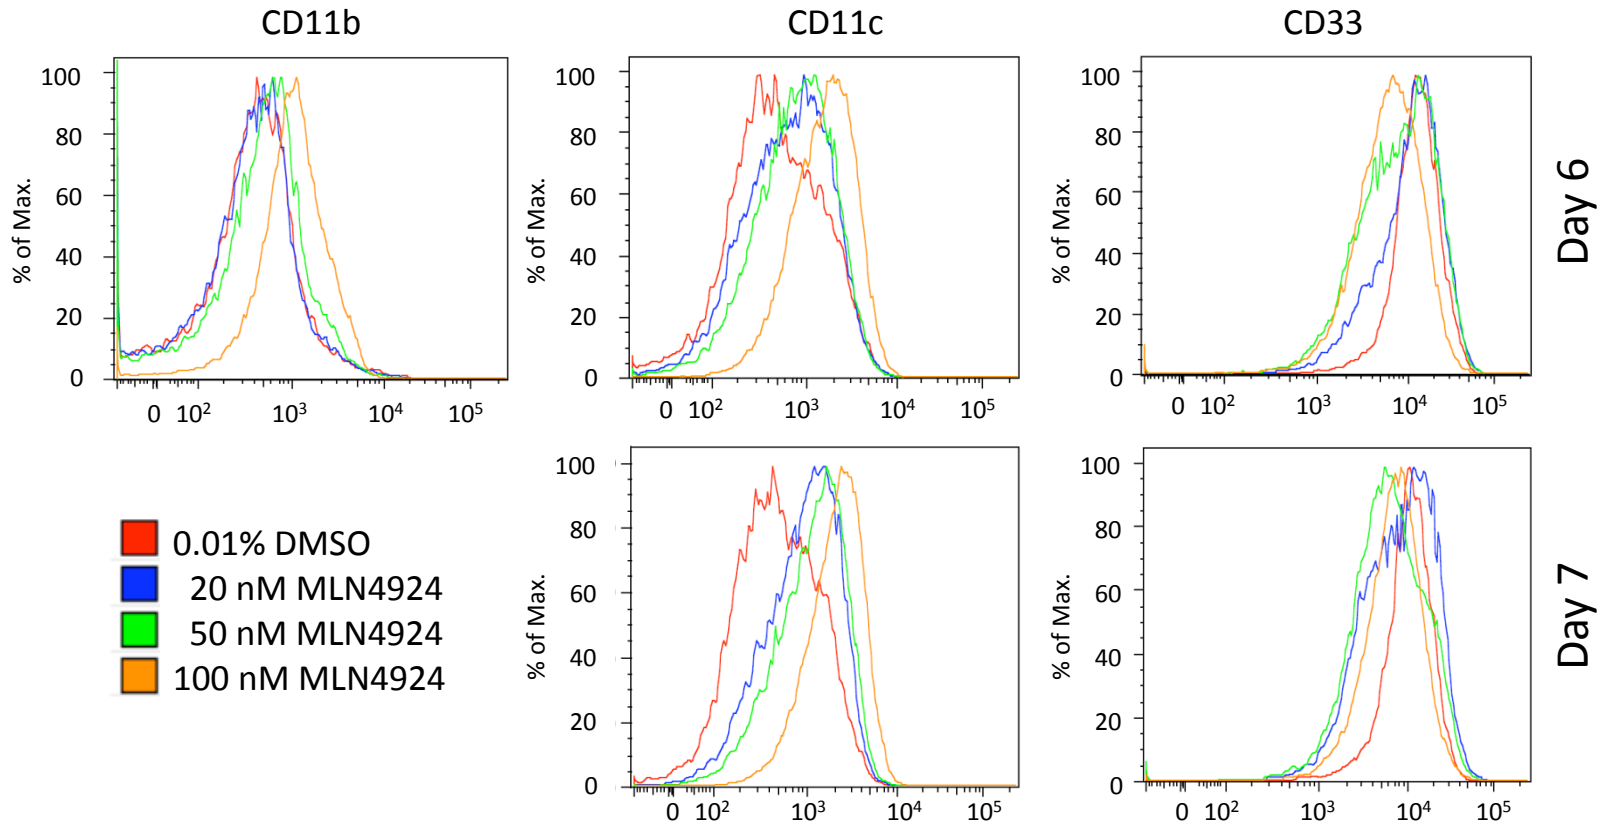

Supplement: NIHMS780742-supplement-Supp_Info_-_Fig_8.pdf [file NIHMS780742-supplement-Supp_Info_-_Fig_8.pdf]
